# Supplementary material for: Imported Plasmodium falciparum and locally transmitted Plasmodium vivax: cross-border malaria transmission scenario in northwestern Thailand
Source: Springer Nature journal article supplement (doi:10.1186/s12936-017-1900-2), 2017-06-21
Supplement: MOESM3 [file 12461582]

## Supporting Information

**Table S1: Patient characteristics for the M2 migrant population\*.**

| <b>Patient characteristics (n=522)</b> | <b>Number (%) or Mean (Range)</b> |
|----------------------------------------|-----------------------------------|
| Age (years)                            | 16.0 (0.25-79)                    |
| Temperature                            | 36.96 (36.0-38.0)                 |
| Male                                   | 211 (40.4%)                       |
| Fever (>37.5°C)                        | 97 (18.5%)                        |
| <b>Malaria Infection</b>               |                                   |
| <i>P. vivax</i>                        | 56 (10.7%)                        |
| <i>P. falciparum</i>                   | 71 (13.6%)                        |
| <i>P. vivax</i> with fever             | 12 (21.4%)                        |
| <i>P. falciparum</i> with fever        | 8 (11.3%)                         |

**Note:** M2 indicates migrants who have been in Thailand less than six months

**Table S2: Patient characteristics for the M1 migrant population\*.**

| <b>Patient characteristics (n=1480)</b> | <b>Number (%) or Mean (Range)</b> |
|-----------------------------------------|-----------------------------------|
| Age (years)                             | 19.4 (0-80)                       |
| Temperature                             | 36.9 (36.0-37.9)                  |
| Male                                    | 732 (49.5%)                       |
| Fever (>37.5°C)                         | 640 (43.2%)                       |
| <b>Malaria Infection</b>                |                                   |
| <i>P. vivax</i>                         | 163 (11.0%)                       |
| <i>P. falciparum</i>                    | 84 (5.7%)                         |
| <i>P. vivax</i> with fever              | 72 (44.2%)                        |
| <i>P. falciparum</i> with fever         | 35 (41.6%)                        |

**Note:** M1 are migrants who have been in Thailand for more than six months.

**Table S3: Patient characteristics for the Thai national population.**

| <b>Patient characteristics (n=2423)</b> | <b>Number (%) or Mean (Range)</b> |
|-----------------------------------------|-----------------------------------|
| Age (years)                             | 20.4 (1-89)                       |
| Temperature                             | 37.0 (34.5-38.0)                  |
| Male                                    | 1131 (47.6%)                      |
| Fever (>37.5°C)                         | 548 (38.5%)                       |
| <b>Malaria Infection</b>                |                                   |
| <i>P. vivax</i>                         | 140 (5.8%)                        |
| <i>P. falciparum</i>                    | 92 (3.8%)                         |
| <i>P. vivax</i> with fever              | 42 (30.0%)                        |
| <i>P. falciparum</i> with fever         | 20 (21.7%)                        |

**Table S4: Occupation distribution among the different population strata.**

| <b>Occupation</b>      | <b>M1</b>   | <b>M2</b>  | <b>Thai</b> | <b>Total</b> |
|------------------------|-------------|------------|-------------|--------------|
| Unknown                | 284         | 29         | 447         | 760          |
| Child                  | 409         | 262        | 548         | 1219         |
| Farmer/Rice Plantation | 114         | 7          | 252         | 373          |
| Forestry               | 0           | 0          | 3           | 3            |
| Gardener               | 3           | 0          | 7           | 10           |
| Public Service         | 0           | 0          | 16          | 16           |
| Merchant               | 8           | 2          | 38          | 48           |
| Cleric                 | 6           | 17         | 3           | 26           |
| Student                | 311         | 7          | 655         | 973          |
| Military/Police        | 0           | 0          | 18          | 18           |
| Disabled               | 1           | 0          | 1           | 2            |
| Housewife              | 1           | 0          | 7           | 8            |
| Labourer               | 314         | 196        | 387         | 897          |
| Retired                | 29          | 2          | 37          | 68           |
| Teacher                | 0           | 0          | 4           | 4            |
| <b>Total</b>           | <b>1480</b> | <b>522</b> | <b>2423</b> | <b>4425</b>  |
